# Supplementary material for: Alveolar epithelial and vascular CXCR2 mediates transcytosis of CXCL1 in inflamed lungs
Source: Springer Nature journal article supplement (doi:10.1038/s41467-025-60174-w), 2025-05-24
Supplement: MOESM1 [file 41467_2025_60174_MOESM1_ESM.pdf]

# **Alveolar epithelial and vascular CXCR2 mediates transcytosis of CXCL1 in inflamed lungs**

Katharina Thomas<sup>1#</sup>, Jan Rossaint<sup>1#</sup>, Nadine Ludwig<sup>1</sup>, Sina Mersmann<sup>1</sup>, Niklas Kötting<sup>1</sup>, Julia Grenzheuser<sup>1</sup>, Lena Schemmelmann<sup>1</sup>, Marina Oguama<sup>1</sup>, Andreas Margraf<sup>1</sup>, Helena Block<sup>1</sup>, Katharina Henke<sup>1</sup>, Katharina Hellenthal<sup>1</sup>, Valbona Mirakaj<sup>2</sup>, Volker Gerke<sup>3</sup>, Uwe Hansen<sup>4</sup>, Karin Gäher<sup>4</sup>, Miguel Engelhardt<sup>6</sup>, Johannes Roth<sup>5</sup>, Johannes Eble<sup>6</sup>, Elin Hub<sup>7</sup>, Antal Rot<sup>7</sup>, Ronen Alon<sup>8</sup>, and Alexander Zarbock<sup>1\*</sup>

<sup>1</sup> Department of Anesthesiology, Intensive Care and Pain Medicine, University Hospital Münster, 48149 Münster, Germany

<sup>2</sup> Department of Anaesthesiology and Intensive Care Medicine, University Tübingen, 72076, Tübingen, Germany

<sup>3</sup> Institute of Medical Biochemistry, Centre for Molecular Biology of Inflammation (ZMBE), University of Münster, 48149 Münster, Germany.

<sup>4</sup> Institute of Experimental Musculoskeletal Medicine, University Hospital Münster, 48149 Münster, Germany

<sup>5</sup> Institute of Immunology, University Hospital Münster, 48149 Münster, Germany

<sup>6</sup> Institute of Physiological Chemistry and Pathobiochemistry, University of Münster, 48149 Münster, Germany

<sup>7</sup> Centre for Microvascular Research, William Harvey Research Institute, Barts and The London School of Medicine and Dentistry, Queen Mary University of London, London EC1M 6BQ, UK

<sup>8</sup> Department of Immunology and Regenerative Biology, Weizmann Institute of Science, Rehovot, Israel.

# Contributed equally

\* Corresponding author

## **Corresponding author**

Alexander Zarbock

Department of Anesthesiology, Intensive Care and Pain Medicine

University Hospital Münster

Albert-Schweitzer-Campus 1, Building A1

48149 Münster, Germany

Phone: +49 (251) 8347252

Fax: +49 (251) 88704

E-mail: zarbock@uni-muenster.de

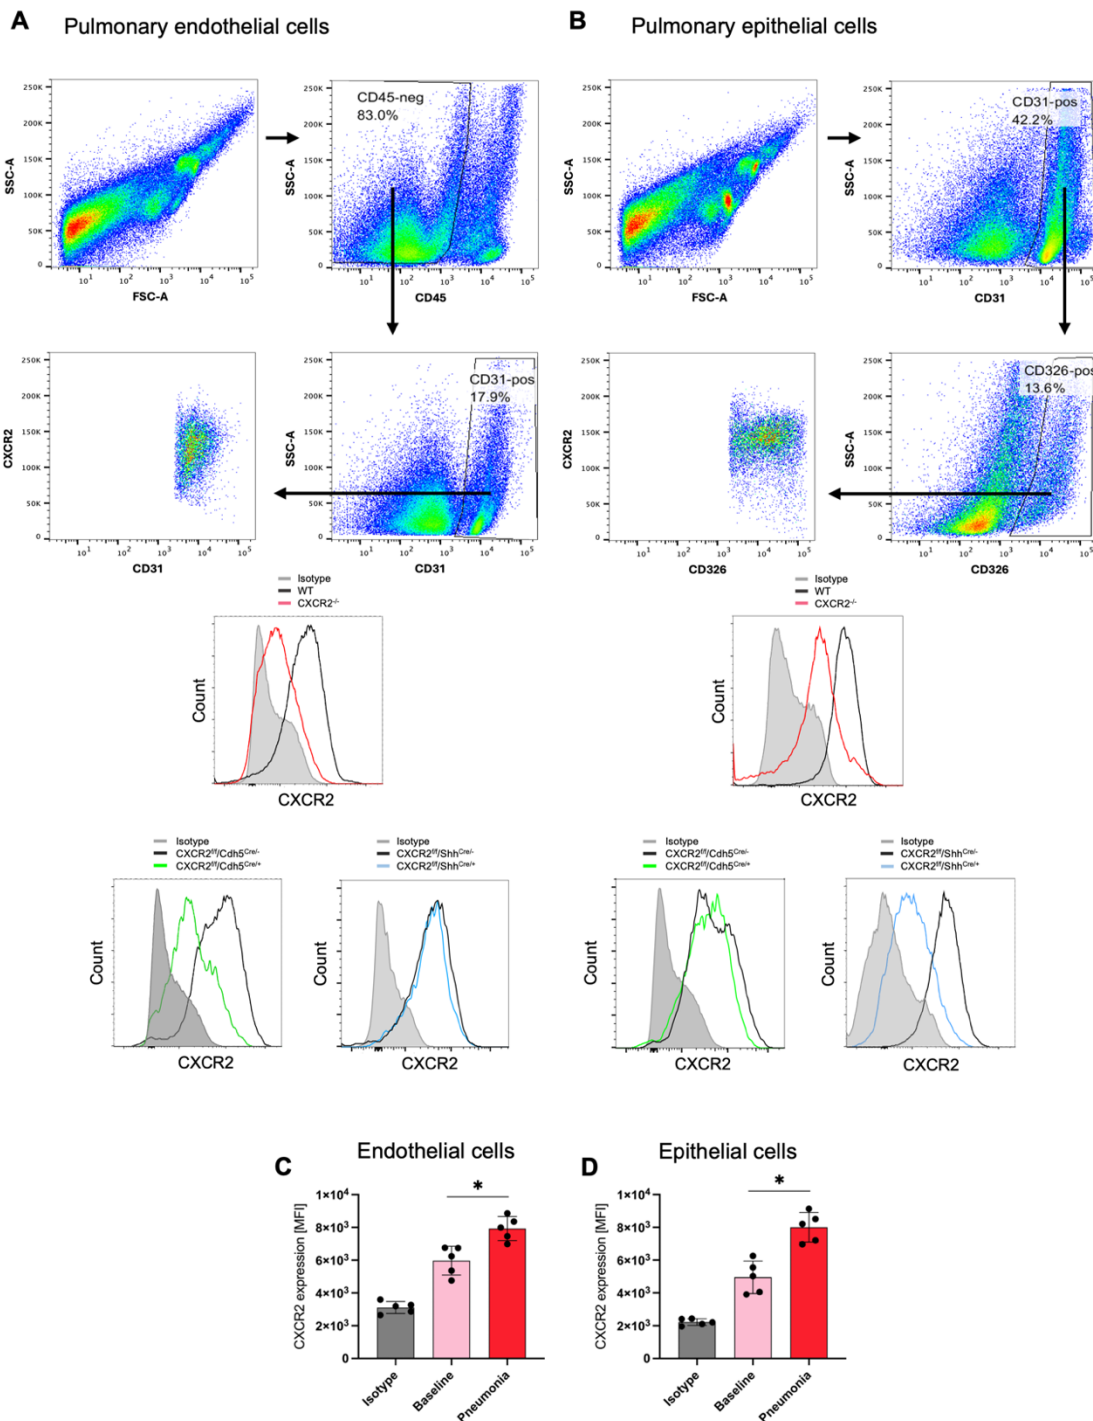

**Supplementary Figure 1: CXCR2 is expressed on pulmonary endothelial and epithelial cells.** CXCR2 KO mice were intratracheally injected with IL-1 $\beta$  and CXCR2 surface expression was analyzed on alveolar endothelial (**A**) and epithelial (**B**) cells 12 hours later via flow cytometry. Red=CXCR2<sup>-/-</sup>, green=CXCR2<sup>fl/fl</sup>Cdh5<sup>Cre+</sup>, blue=CXCR2<sup>fl/fl</sup>Shh<sup>Cre</sup>, WT/Cre<sup>-</sup> controls=black. Isotype controls are marked in grey. Bacterial pneumonia was induced in WT mice by intratracheal instillation of viable *K. pneumoniae* and CXCR2 expression (**C**) on lung endothelial and (**D**) epithelial cells was analyzed by flow cytometry (n=5 biologically independent mice pre group, age 8-16 weeks, random gender distribution). Data are mean  $\pm$  SD, one-way ANOVA followed by Bonferroni correction, \*p<0.05.

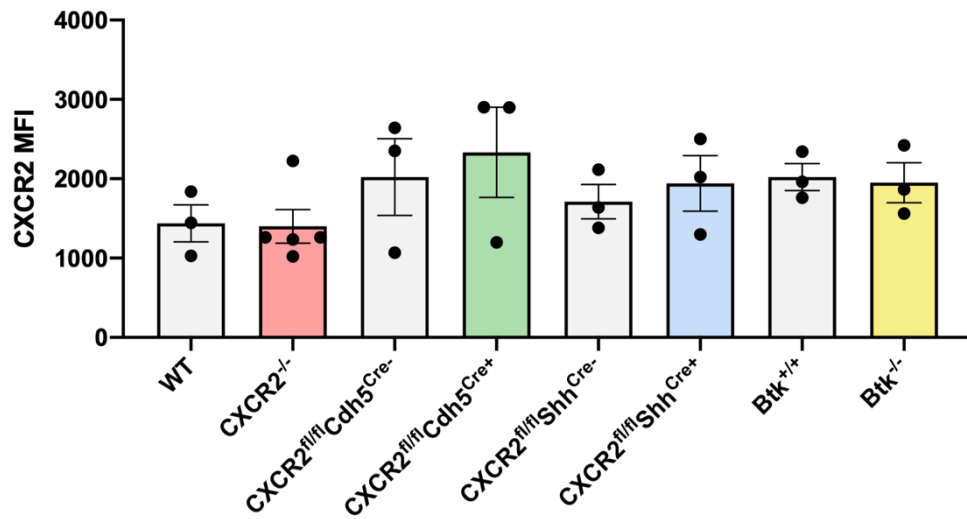

**Supplementary Figure 2: CXCR2 expression on circulating neutrophils.** Whole blood samples were withdrawn from the indicated mouse lines under baseline conditions and stained for CD45, Ly6G and CXCR2. The mean fluorescence intensity (MFI) of CXCR2 in CD45<sup>+</sup>Ly6G<sup>+</sup> cells was analyzed by flow cytometry. Data are mean  $\pm$  SD, n=3-5 biologically independent mice pre group, age 8-16 weeks, equal gender distribution, one-way ANOVA, \*p<0.05.

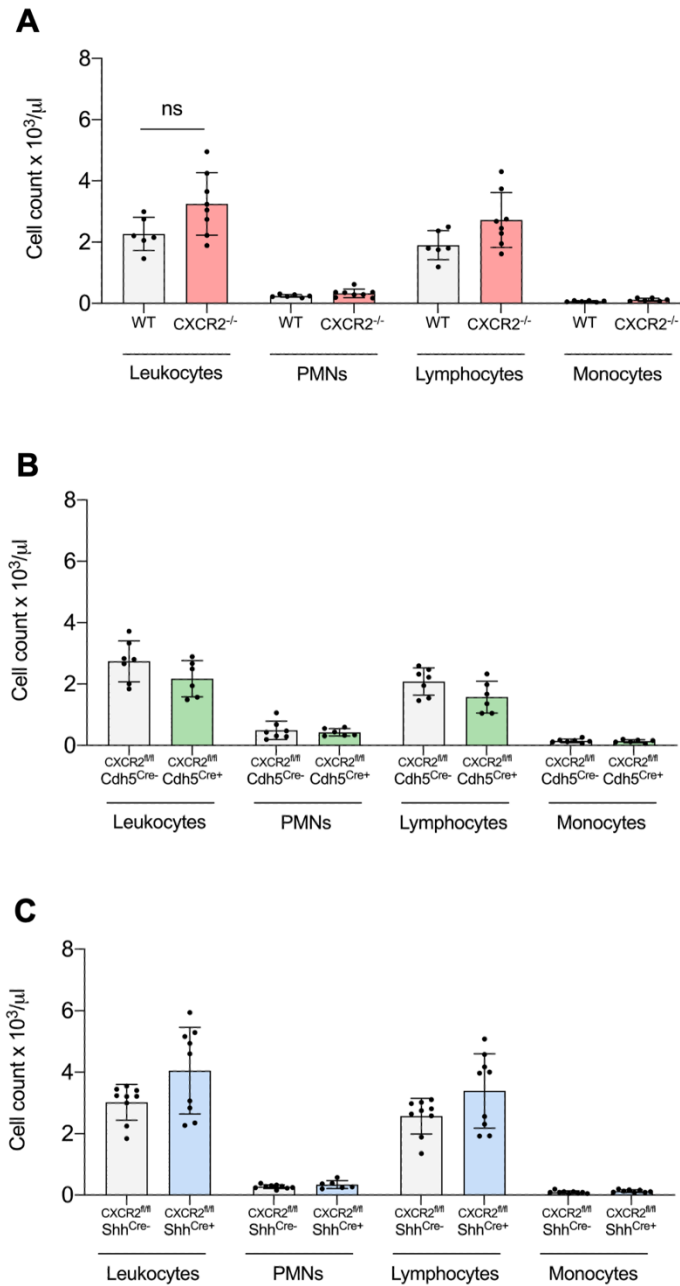

**Supplementary Figure 3: Baseline leukocyte counts.** Blood was drawn from CXCR2 KO mice and analyzed in a Sysmex haemocytometer. Total leukocyte counts as well as neutrophil, lymphocyte and monocyte counts are displayed for CXCR2<sup>-/-</sup> mice **(A)**, CXCR2<sup>fl/fl</sup>Cdh5<sup>Cre+</sup> mice **(B)**, CXCR2<sup>fl/fl</sup>Shh<sup>Cre+</sup> mice **(C)** and respective control mice. Data are mean  $\pm$  SD, n=6-9 biologically independent mice per group, age 8-16 weeks, equal gender distribution, one-way ANOVA followed by Bonferroni correction.

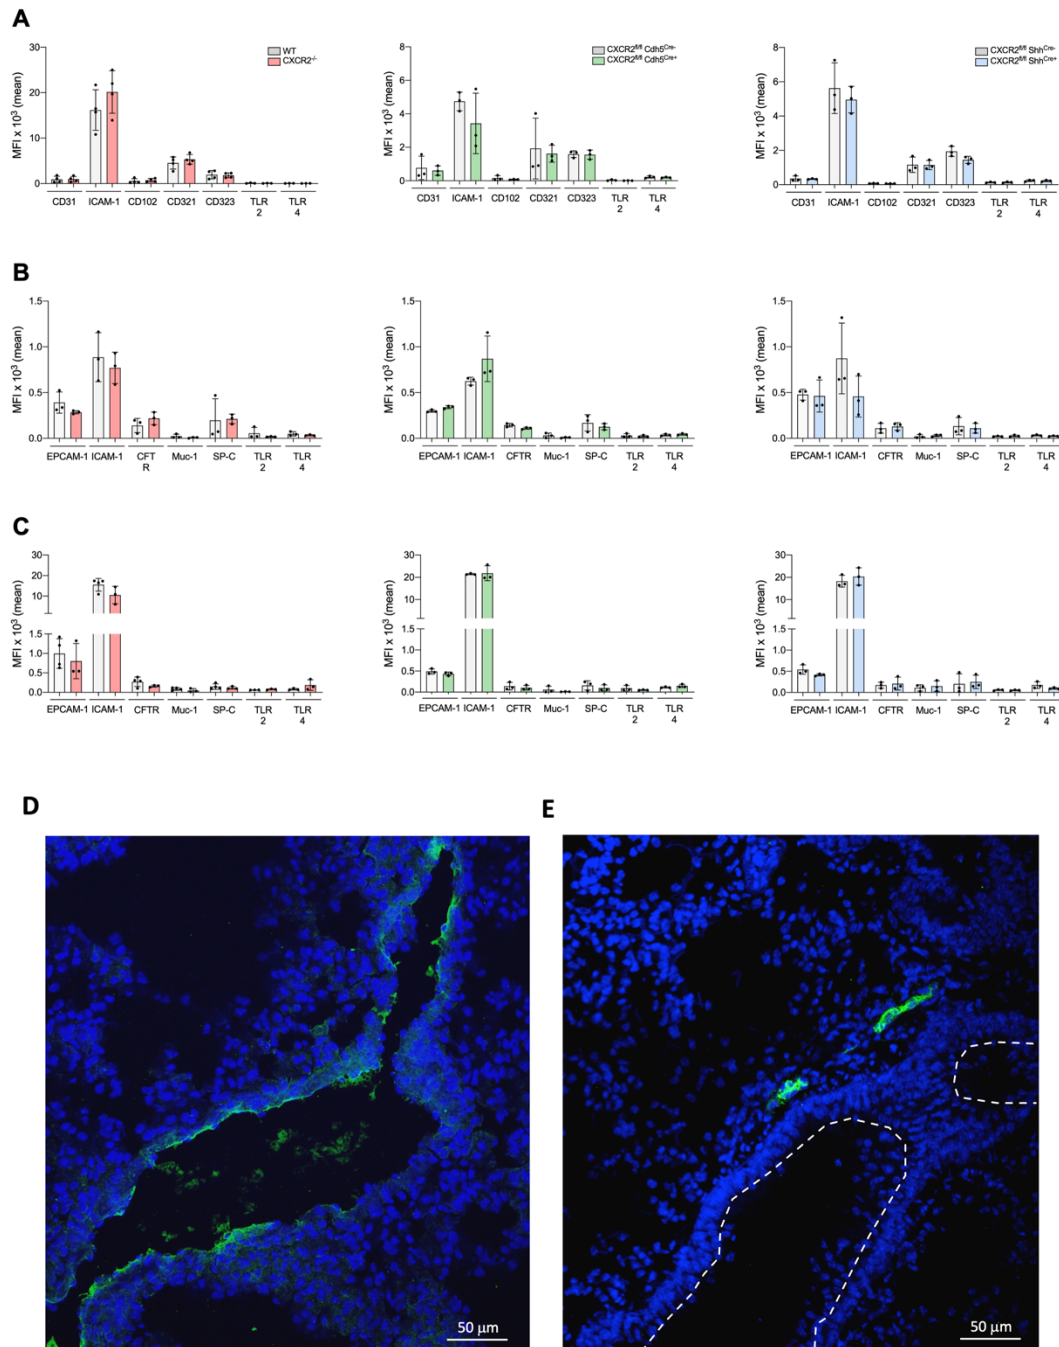

**Supplementary Figure 4: Surface marker expression of endothelial and epithelial cells.** MLMVECs and AECs were isolated and analyzed for common surface markers by flow cytometry. **(A)** Expression of CD31, CD54, CD102, CD321, CD323, TLR2 and TLR4 was determined on MLMVECs which were isolated from different CXCR2 KO mice (red = CXCR2<sup>-/-</sup>, green = CXCR2<sup>fl/fl</sup>Cdh5<sup>Cre+</sup>, blue = CXCR2<sup>fl/fl</sup>Shh<sup>Cre+</sup>, grey = WT/Cre<sup>-</sup> controls). CD326, CD54, Connexin-43, CFTR, Mucin-1, SP-C, TLR2 and TLR4 expression was analyzed on **(B)** AECs type II (2 days after isolation) and **(C)** type I (7 days after isolation). **(D)** Specific anti-ACKR1 antibody staining associated with the endothelial cell lining of a large vein and erythrocytes in the vessel lumen (green). **(E)** ACKR1 staining (green) in venules lining the bronchial tree in the submucosa of a large bronchus (bronchial lumen outlined by dotted line). Cell nuclei stained with DAPI (blue), scale bars equal 50µm. Data are mean ± SD, n=3-4 biologically independent experiments per group, one-way ANOVA.

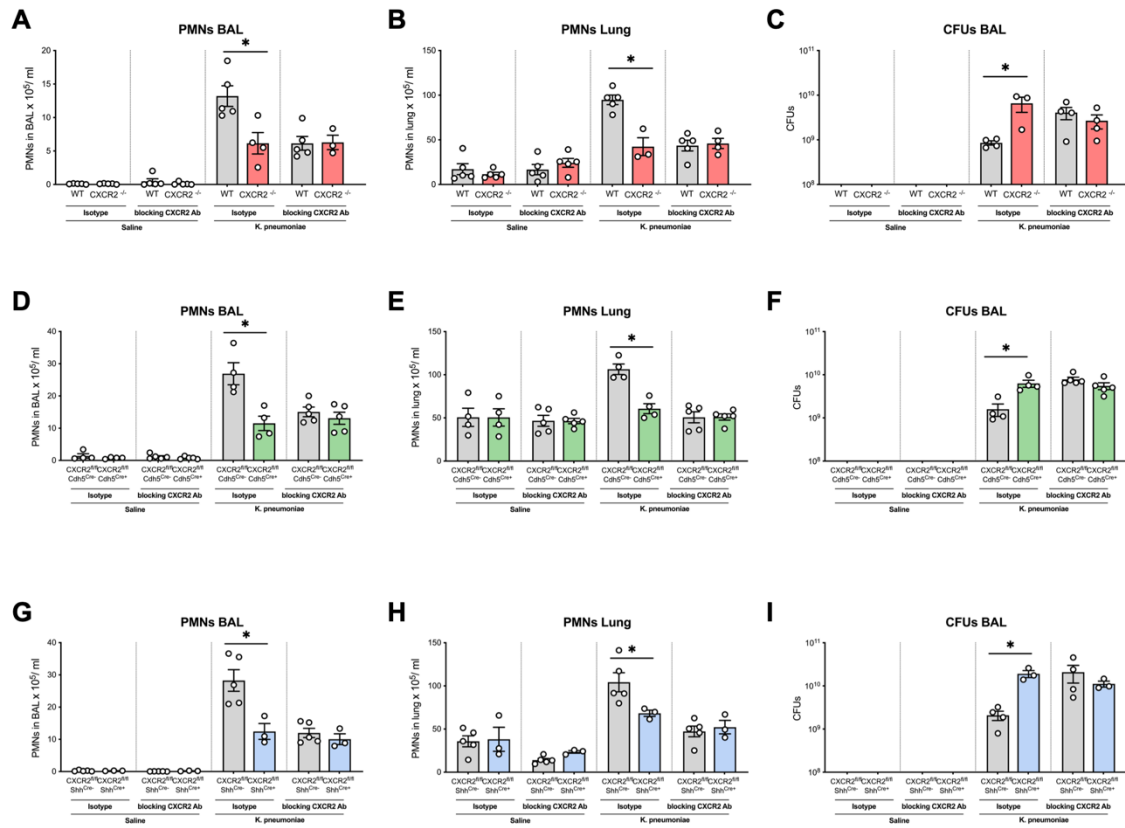

**Supplementary Figure 5: Blocking CXCR2 antibody.** CXCR2 KO mice (red = CXCR2<sup>-/-</sup>, green = CXCR2<sup>fl/fl</sup>Cdh5<sup>Cre+</sup>, blue = CXCR2<sup>fl/fl</sup>Shh<sup>Cre+</sup>) and appropriate WT/Cre<sup>-</sup> control (grey) mice were intratracheally injected with a blocking CXCR2 antibody (30 µg, R&D) or isotype control and afterwards intratracheally administered with sterile saline or with viable *K. pneumoniae*. Neutrophil recruitment into the BAL (**A, D, G**) and into the lung (**B, E, H**) as well as CFU counts in the BAL (**C, F, I**) were assessed 24 h after infection. Data are mean ± SD, n=3-5 biologically independent mice per group, age 8-16 weeks, equal gender distribution, one-way ANOVA followed by Bonferroni correction, \*p<0.05.

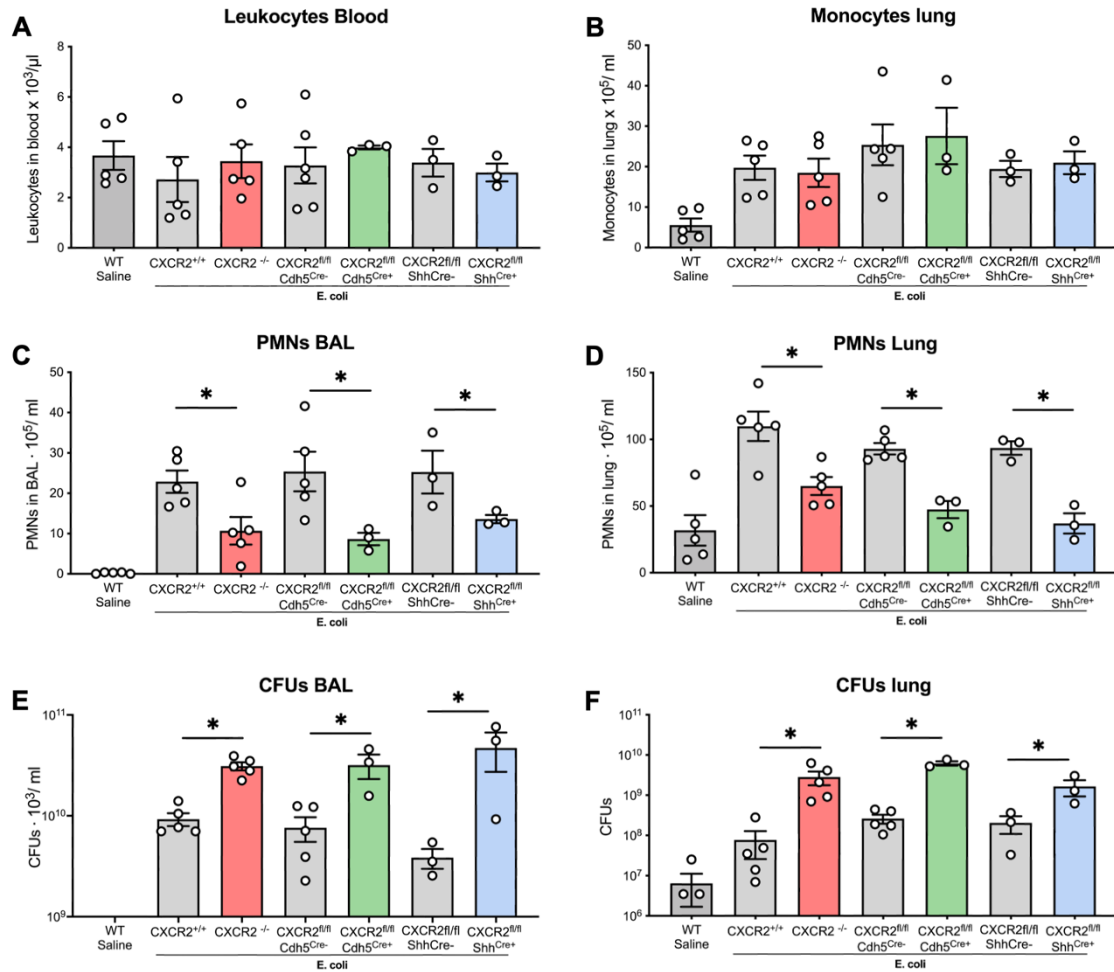

**Supplementary Figure 6: *E. coli* pulmonary infection model.** CXCR2 KO mice (red = CXCR2<sup>-/-</sup>, green = CXCR2<sup>fl/fl</sup>Cdh5<sup>Cre+</sup>, blue = CXCR2<sup>fl/fl</sup>Shh<sup>Cre+</sup>) and appropriate WT/Cre<sup>-</sup> control (grey) mice were intratracheally administered with sterile saline or with viable *E. coli*. Leukocyte blood counts (**A**) and monocyte counts in the lung (**B**) were analyzed after 24 hours. Neutrophil recruitment into the BAL (**C**) and into the lung (**D**) as well as CFU counts in the BAL (**E**) and the lung tissue (**F**) were assessed 24 hours after infection. Data are mean  $\pm$  SD, n=3-5 biologically independent mice per group, age 8-16 weeks, equal gender distribution, one-way ANOVA followed by Bonferroni correction, \*p<0.05.

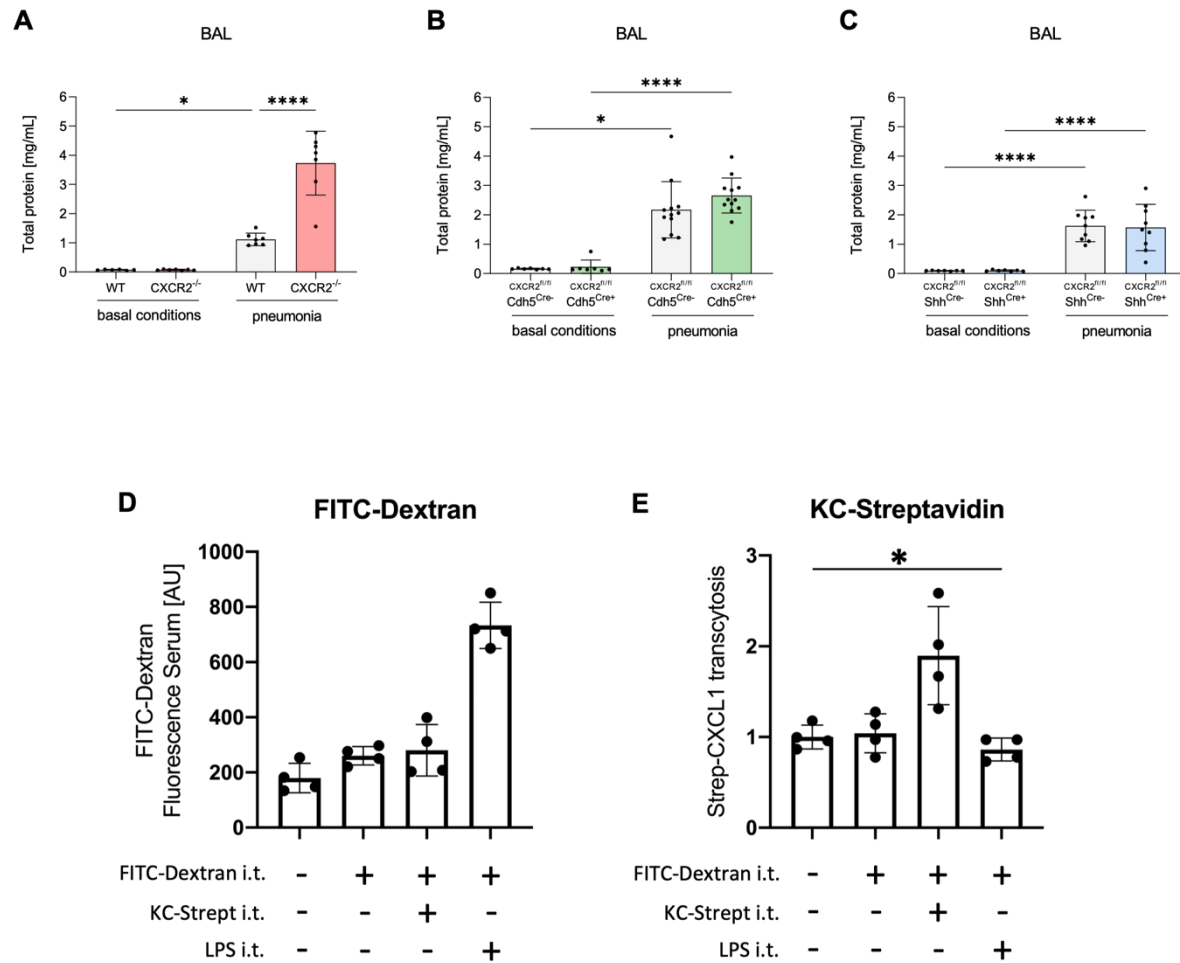

**Supplementary Figure 7: Total protein content is elevated in full but not conditional KO mice after lung infection.** Total protein concentrations were measured in BAL using a BCA Assay kit under baseline conditions and after *K. pneumoniae*-induced lung infection (pneumonia). **(A)** CXCR2<sup>-/-</sup> (red), **(B)** CXCR2<sup>fl/fl</sup> Cdh5<sup>Cre+</sup> (green) and **(C)** CXCR2<sup>fl/fl</sup> Shh<sup>Cre+</sup> (blue) mice were compared with appropriate WT/Cre<sup>-</sup> control animals. Data are mean  $\pm$  SD, n=7-12 biologically independent mice per group, age 8-16 weeks, equal gender distribution. Wildtype mice were intratracheally injected with CXCL1-Streptavidin (MW 8kDa), FITC-Dextran (MW 10kDa) or LPS as a positive control. **(D)** After 4 h, blood samples were obtained and the serum levels of FITC-Dextran were analyzed by photometry. **(E)** The levels of transcytosed streptavidin-coupled CXCL1 were analyzed by an ELISA using a CXCL1 capture antibody and a biotin-HRP conjugated detection antibody. n=4 biologically independent mice per group, age 8-16 weeks, equal gender distribution, one-way ANOVA followed by Bonferroni correction, \*p<0.05, \*\*\*\* p<0.0001.



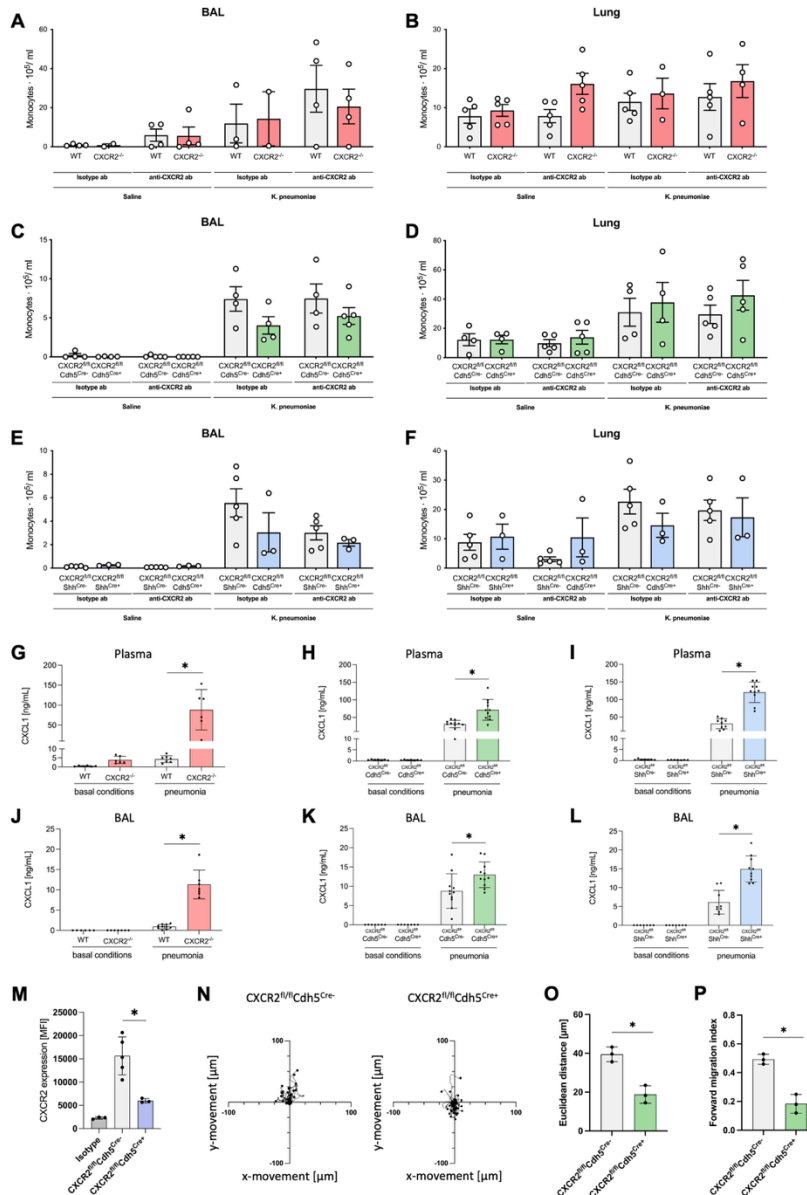

**Supplementary Figure 8: Inflammatory monocyte trafficking into the lung during bacterial pneumonia.** CXCR2 KO mice (red = CXCR2<sup>-/-</sup>, green = CXCR2<sup>fl/fl</sup>Cdh5<sup>Cre+</sup>, blue = CXCR2<sup>fl/fl</sup>Shh<sup>Cre+</sup>) and appropriate WT/Cre<sup>-</sup> control (grey) mice were injected with a blocking CXCR2 antibody (30  $\mu$ g, R&D) or isotype control and afterwards intratracheally administered with sterile saline or with viable *K. pneumoniae*. After 24 hours, the numbers of monocytes in the BAL (**A**, **C**, **E**) and lung tissue (**B**, **D**, **F**) were analyzed by flow cytometry as CD45<sup>+</sup>CD11b<sup>+</sup>CX3CR1<sup>+</sup>CD115<sup>+</sup> cells (n=3-5 biologically independent mice pre group, age 8-16 weeks, equal gender distribution). CXCR2 KO mice (red = CXCR2<sup>-/-</sup>, green = CXCR2<sup>fl/fl</sup>Cdh5<sup>Cre+</sup>, blue = CXCR2<sup>fl/fl</sup>Shh<sup>Cre+</sup>) and appropriate WT/Cre<sup>-</sup> control (grey) mice were intratracheally administered with sterile saline or with viable *K. pneumoniae*. CXCL1 concentrations in the plasma (**G-I**) and the BAL (**J-L**) were assessed 24 h after infection (n=6-11 biologically independent mice pre group, age 8-16 weeks, equal gender distribution). (**M**) CXCR2 expression levels on neutrophils was analyzed by flow cytometry and (**N-P**) migration of neutrophils was investigated in vitro (n=3 biologically independent samples per group). Data are mean  $\pm$  SD, one-way ANOVA followed by Bonferroni correction or t-text, \*p<0.05.

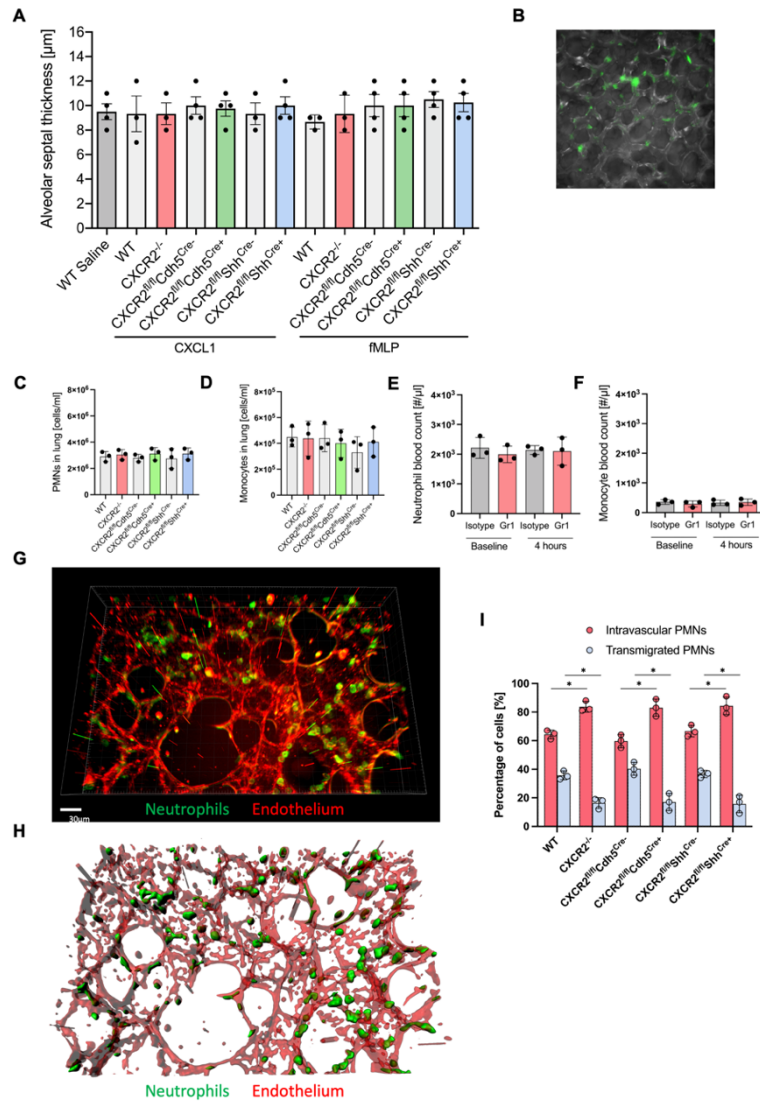

**Supplementary Figure 9: Lung septal thickness in lung intravital microscopy. (A)** Intravital microscopy of the lung was performed in CXCR2 KO mice (red = CXCR2<sup>-/-</sup>, green = CXCR2<sup>fl/fl</sup>Cdh5<sup>Cre+</sup>, blue = CXCR2<sup>fl/fl</sup>Shh<sup>Cre+</sup>) and appropriate WT/Cre<sup>-</sup> controls (grey) 4 hours after intratracheal injection of sterile saline, CXCL1 or fMLP and the thickness of the alveolar septa (air-to-air distance) was analyzed. **(B)** Lung intravital microscopy of WT mice with Gr1-Alexa488 and CD115-Alexa 568 antibody (exemplary image from n=3 independent experiments). WT mice were intratracheally injected with CXCL1 and administered the Gr1 antibody or isotype control and analyzed the abundance of **(C)** neutrophils and **(D)** monocytes in the lung by flow cytometry after 4 hours (n=3 biologically independent mice pre group, age 8-16 weeks, random gender distribution). WT mice were administered with 4 $\mu\text{g}$  of labeled Gr1 antibody and **(E)** neutrophil and **(F)** monocyte blood counts were analyzed after 4 hours (n=3 biologically independent mice pre group, age 8-16 weeks, random gender distribution). Precision cut lung slices were obtained from CXCR2<sup>-/-</sup>, CXCR2<sup>fl/fl</sup>Cdh5<sup>Cre+</sup> or CXCR2<sup>fl/fl</sup>Shh<sup>Cre+</sup> and appropriate WT/Cre<sup>-</sup> controls 4 hours after intratracheal injection of CXCL1. Exemplary images of **(G)** raw z-stack and **(H)** 3D reconstruction by volume rendering. **(I)** The distribution of neutrophils in the intravascular space and neutrophils emigrated into the extravascular lung tissue was analyzed. Data are mean  $\pm$  SD, scale bars equal 30  $\mu\text{m}$ , n=3 biologically independent mice pre group, age 8-16 weeks, equal gender distribution, one-way ANOVA followed by Bonferroni correction, \*p<0.05.

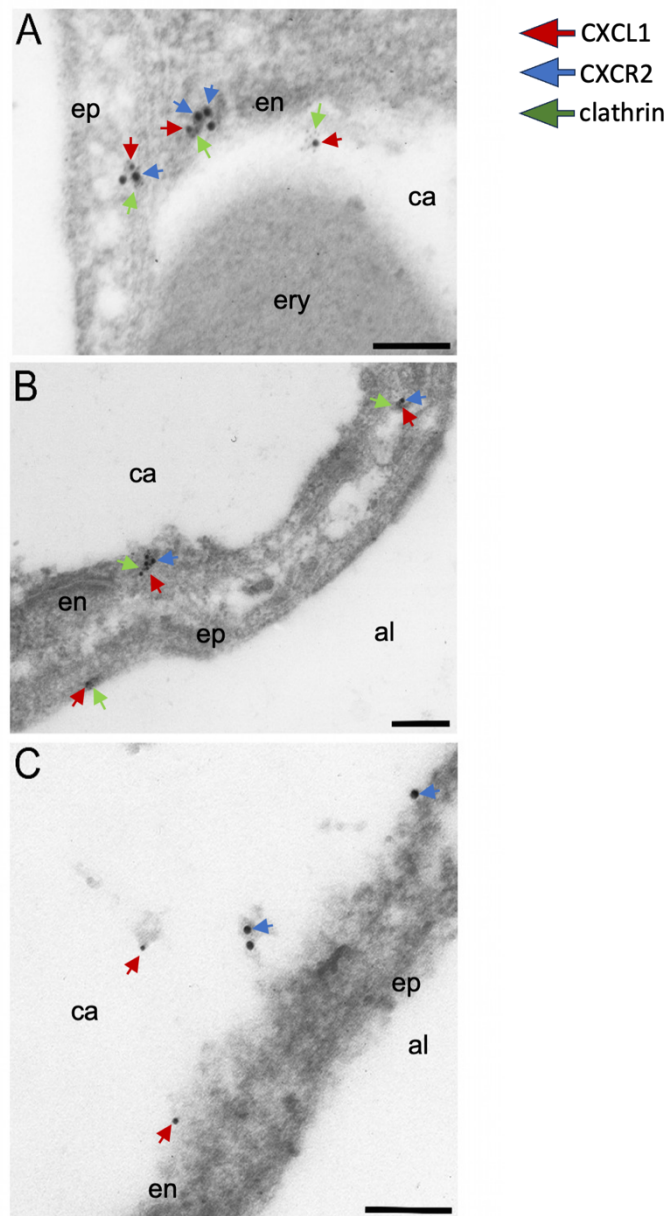

**Supplementary Figure 10: CXCL1 and CXCR2 co-localize in pulmonary epithelial and endothelial cells.** Colocalization of CXCR2 (blue), CXCL1 (red) and clathrin (green) was analyzed in ultrathin cross-sectioned lung tissue from *K. pneumoniae* infected WT mice via transmission electron microscopy (TEM). **(A)** CXCL1/CXCR2/clathrin complexes at the apical plasma membrane of endothelial cells. **(B)** CXCL1/CXCR2/clathrin complexes in epithelial and endothelial cells. **(C)** CXCL1 and CXCR2 on endothelial protrusions. Abbreviations: ery=erythrocyte, ca=capillary, en=endothelium, ep=epithelium, al=alveolar space. Scale bar: 500 nm
